# Supplementary material
Source: Springer Nature journal article supplement (https://www.springermedizin.de/resource/supplementary/12967_2013_1678_MOESM5_ESM.pdf/9574632)

**A**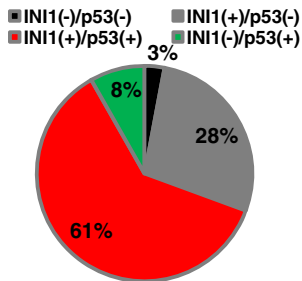**B****Stages I-IV**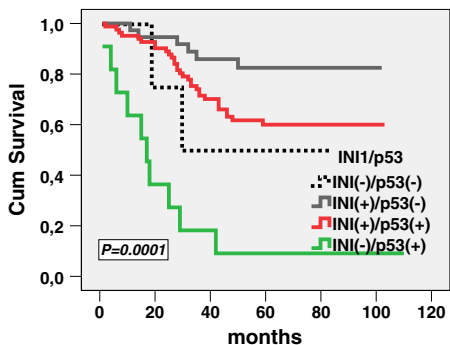**C****Stages I-II**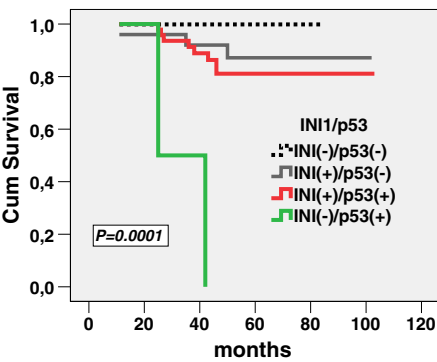**D**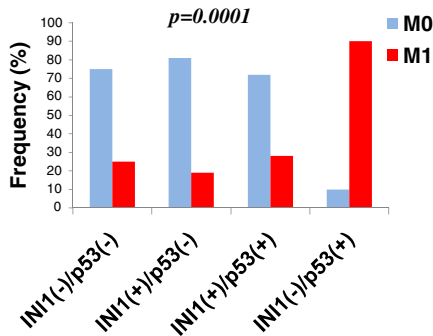

Supplement: MOESM5 [file 9574632]
